# Supplementary material for: Ultrafast Evolution and Loss of CRISPRs Following a Host Shift in a Novel Wildlife Pathogen, Mycoplasma gallisepticum
Source: PLOS journal article supplement (doi:10.1371/journal.pgen.1002511), 2012-02-09
Supplement: S14 (10.1371/journal.pgen.1002511.s014) [file journal.pgen.1002511.s014]

**Table S8. Descriptions of six novel insertion sites of IS elements and insert characteristics for House Finch MG strains.**

|   | <b>Approximate Location</b> | <b>Sides Present</b> | <b>Target Gene</b> | <b>Description of Insertion Area</b>                                                                            |
|---|-----------------------------|----------------------|--------------------|-----------------------------------------------------------------------------------------------------------------|
| A | 124818                      | 5'                   | MGA_0801           | Potential C-terminal fragment of subtilisin like protease                                                       |
| B | 295023                      | Both                 | None               | This section of the genome is unannotated. The location is 1,047 and 276 bp away from the genes on either side. |
| C | 464795                      | Both                 | MGA_1220           | ArcA, a predicted arginine deiminase                                                                            |
| D | 537089                      | Both                 | None               | This landed inside a pseudo-gene that formerly was an acetyl-CoA hydrolase/transferase                          |
| E | 560163                      | Both                 | None               | This is 201 bp and 167 bp away from the nearest genes on either side.                                           |
| F | 938560                      | 5'                   | None               | This is 142 bp and 151 bp away from the genes on either side of this insertion.                                 |
